# Supplementary material for: Dissipative particle dynamics simulations of the morphologies and dynamics of linear ABC triblock copolymers in solutions
Source: Royal Society of Chemistry journal article supplement (doi:10.1039/c5ra09661h), 2015-01-01

# Dissipative Particle Dynamics Simulation on Morphologies and Dynamics of Linear ABC Triblock Copolymers in Solutions

Chun Zhou,<sup>a</sup> Honggang Xia,<sup>\*b</sup> Yang Zhou,<sup>\*c</sup> and Shikai Luo<sup>c</sup>

<sup>a</sup> School of Materials Science and Engineering, Southwest University of Science and Technology, 621010 Mianyang, China; <sup>b</sup> The 1st Affiliated Hospital of Dalian Medical University, Dalian, 116000; <sup>c</sup> Institute of Chemical Materials, Chinese Academy of Engineering and Physics, Mianyang, 621900, China. E-mail: xia\_honggang@126.com (H.X.) and zhouy@caep.cn (Y.Z.).

## Supporting Information

### Figure Legends

**Figure S1.** Morphological phase diagrams of *I*-BAC. Color scheme in the snapshots: A (red), B (blue), C (green).

**Figure S2.** Morphological phase diagrams of *I*-ABC (8-8-8). Color scheme in the snapshots: A (red), B (blue), C (green).

**Figure S3.** Morphological phase diagrams of *I*-ACB (4-4-4). Color scheme in the snapshots: A (red), B (blue), C (green).

### Figure S1.

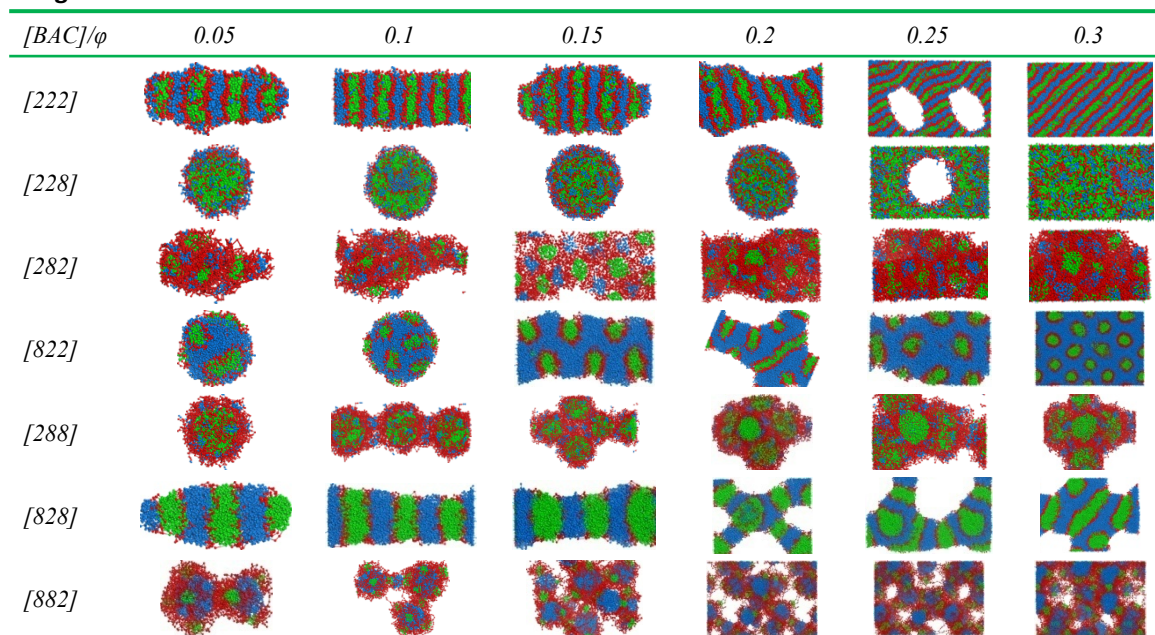

**Figure S2.**

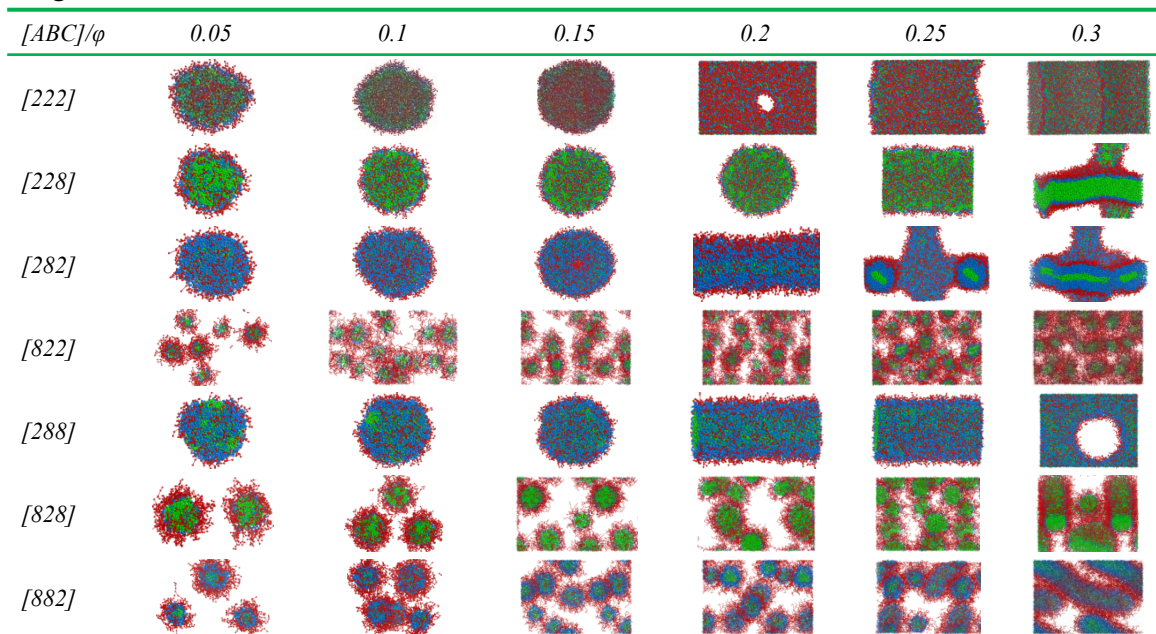

**Figure S3.**

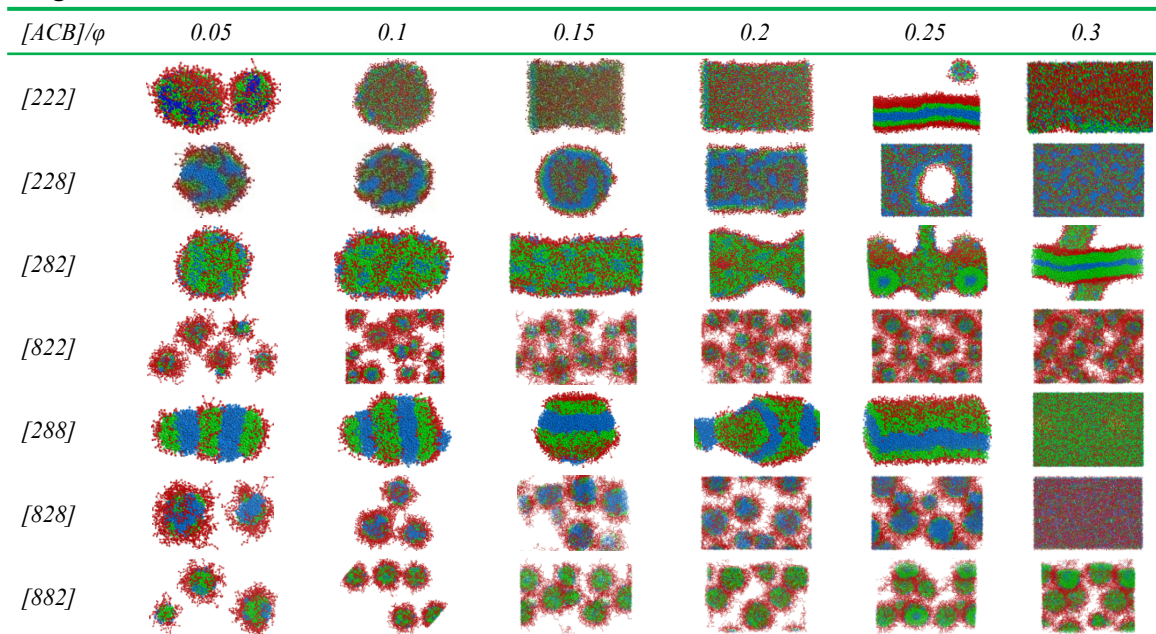

Supplement: c5ra09661h1.pdf [file c5ra09661h1.pdf]
